# Supplementary material for: Diversifying the Flavor of Black Rice Wines through Three Different Regional Xiaoqus in China and Unraveling Their Core Functional Microorganisms
Source: MDPI journal article supplement (doi:10.3390/foods12193576), 2023-09-26
Supplement: s1 [file s1]

## Supplementary Materials

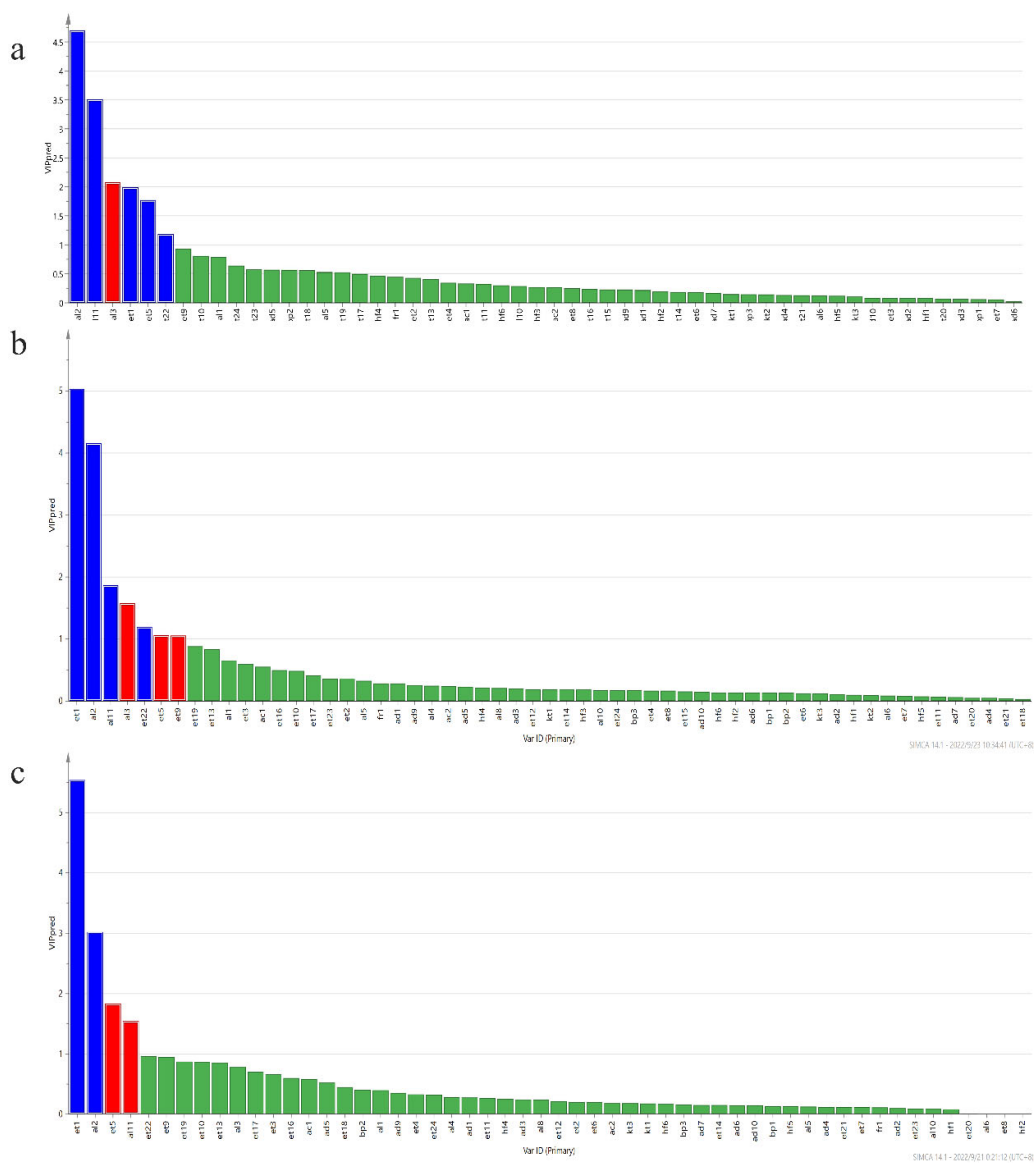

**Figure S1.** VIPpred score chart of volatile components of different black rice wines (336 h) based on OPLS-DA analysis (VIPpred > 1 and  $p < 0.05$ ). (a) Q1(blue) vs. Q2 (red); (b) Q3(blue) vs. Q2 (red); (c) Q3(blue) vs. Q1 (red); Blue and red compounds are biomarkers of relevant black rice wine.

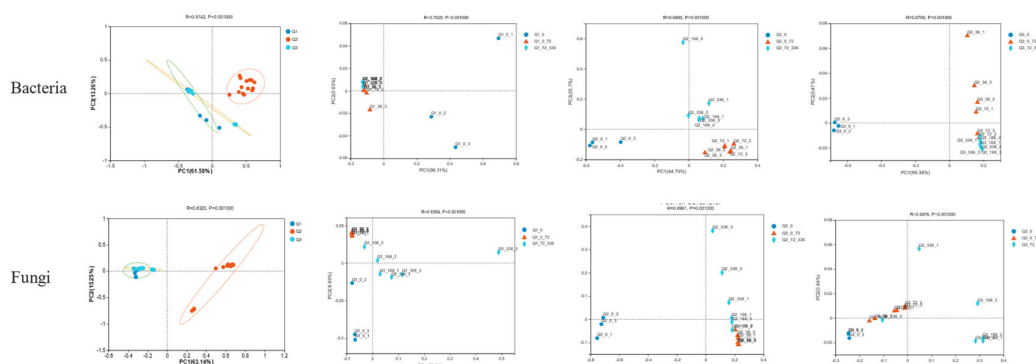

Figure S2. PCoA score plots of bacteria and fungi in all samples and each Xiaoqu samples.

Table S1. Changes of physicochemical properties during black rice wine fermentation .

| Fermentation(h) | Total acids (g/L) |             |             | Reducing sugar(g/L) |                |                | Alcohol content (% , v/v) |              |              | Total anthocyanin content(mg/L) |               |               | pH          |             |             |
|-----------------|-------------------|-------------|-------------|---------------------|----------------|----------------|---------------------------|--------------|--------------|---------------------------------|---------------|---------------|-------------|-------------|-------------|
|                 | Q1                | Q2          | Q3          | Q1                  | Q2             | Q3             | Q1                        | Q2           | Q3           | Q1                              | Q2            | Q3            | Q1          | Q2          | Q3          |
| 36              | 4.19±0.03Ab       | 4.62±0.09Bc | 5.37±0.1Ac  | 330.34±14.77Cc      | 437.16±15.2Ad  | 325.56±13.11Bd | 0.95±0.05Aa               | 2.45±0.05Ba  | 3.90±0.00Ca  | 268.52±2.52Aa                   | 199.05±2.34Ba | 219.53±3.66Ca | 4.12±0.02Ab | 4.31±0.04Bb | 4.37±0.02Ca |
| 72              | 7.25±0.04Ca       | 7.62±0.11Bb | 6.91±0.06Ab | 361.02±11.05Cc      | 273.46±15.81Ac | 273.12±6.41Bc  | 4.37±0.06Ab               | 7.93±0.06Bb  | 7.93±0.12Bb  | 266.85±0.33Bb                   | 123.57±2.34Cc | 196.71±2.03Ac | 4.23±0.03Ac | 4.24±0.01Aa | 4.52±0.02Bc |
| 168             | 10.39±0.09Ca      | 6.77±0.04Aa | 6.02±0.06Ba | 8.46±0.70Cb         | 1.29±0.06Ab    | 7.17±0.4Bb     | 13.07±0.21Ac              | 13.7±0.26Bc  | 12.80±0.10Ac | 154.21±3.46Cc                   | 86.08±1.47Bb  | 124.74±4.14Ab | 4.01±0.01Aa | 4.38±0.04Bc | 4.47±0.02Cb |
| 336             | 10.47±0.04Ba      | 6.92±0.04Aa | 6.09±0.02Ba | 2.96±0.01Ca         | 1.76±0.01Aa    | 2.95±0.11Ba    | 13.47±0.06Ad              | 13.40±0.10Ad | 13.47±0.06Ad | 135.01±2.18Cc                   | 77.48±1.01Bb  | 108.29±3.06Ab | 4.04±0.04Aa | 4.47±0.02Bd | 4.56±0.04Cc |

Q1 (Sicuang Dazhu), Q2 (Jiangxi Yingtan), Q3 (Hubei Fangxian); Values are presented as mean ± standard deviation (n = 3); A-B: Different capital letters mean the significant difference among the three Xiaoqu ( $p < 0.05$ ); a-f: Different lowercase letters mean the significant difference among the same column ( $p < 0.05$ ).

Table S2. alpha diversity of black rice wine samples during fermentation.

| fermentation<br>time (h) | Bacteria |       |         |        |         |       | Fungi   |       |         |       |         |       | Goods |
|--------------------------|----------|-------|---------|--------|---------|-------|---------|-------|---------|-------|---------|-------|-------|
|                          | Q1       |       | Q2      |        | Q3      |       | Q1      |       | Q2      |       | Q3      |       |       |
|                          | Shannon  | Chao  | Shannon | Chao   | Shannon | Chao  | Shannon | Chao  | Shannon | Chao  | Shannon | Chao  |       |
| 0                        | 1.07     | 96.48 | 1.34    | 254.24 | 1.63    | 83.43 | 0.37    | 13    | 0.98    | 43.49 | 0.06    | 25.92 | 0.999 |
| 36                       | 0.19     | 33.85 | 1.79    | 52.48  | 0.45    | 46.89 | 0.03    | 26.65 | 0.8     | 24.88 | 0.53    | 24.75 | 0.999 |
| 72                       | 0.14     | 36.35 | 1.72    | 75.29  | 0.24    | 41.18 | 0.03    | 24.23 | 0.86    | 28.05 | 0.81    | 44.78 | 0.999 |
| 168                      | 0.02     | 38.75 | 2.64    | 75.64  | 0.17    | 71.25 | 0.48    | 34.17 | 1.05    | 39.25 | 1.35    | 66.14 | 0.999 |
| 336                      | 0.04     | 25.48 | 3.18    | 227.37 | 0.15    | 37.88 | 0.76    | 53.28 | 1.37    | 47.11 | 0.98    | 41.03 | 0.999 |

Table S3. The dominant microbial communities of different Xiaoqu during black rice wine fermentation.

| Xiaoqu | Kingdom  | Class                            | Genus                            | Abundance |
|--------|----------|----------------------------------|----------------------------------|-----------|
| Q1     | Bacteria | Bacilli                          | <i>Pediococcus</i>               | 86.74%    |
|        | Fungi    | Saccharomycetes                  | <i>Saccharomycopsis</i>          | 89.26%    |
|        | Fungi    | Saccharomycetes                  | <i>Wickerhamomyces</i>           | 6.87%     |
| Q2     | Bacteria | Bacilli                          | <i>Bacillus</i>                  | 28.18%    |
|        | Bacteria | Gammaproteobacteria              | <i>Enterobacter</i>              | 22.30%    |
|        | Bacteria | Gammaproteobacteria              | <i>Achromobacter</i>             | 10.62%    |
|        | Bacteria | unclassified_k_norank_d_Bacteria | unclassified_k_norank_d_Bacteria | 8.07%     |
|        | Bacteria | Gammaproteobacteria              | <i>Pantoea</i>                   | 7.42%     |
|        | Bacteria | Bacilli                          | <i>Pediococcus</i>               | 5.14%     |
|        | Bacteria | Gammaproteobacteria              | <i>Acinetobacter</i>             | 2.56%     |
|        | Bacteria | Bacilli                          | <i>Weissella</i>                 | 2.20%     |
|        | Fungi    | Saccharomycetes                  | unclassified_f_Metschnikowiaceae | 49.68%    |
|        | Fungi    | Saccharomycetes                  | <i>Clavispora</i>                | 20.38%    |
|        | Fungi    | Saccharomycetes                  | <i>Wickerhamomyces</i>           | 7.93%     |

|    |          |                 |                         |        |
|----|----------|-----------------|-------------------------|--------|
|    | Fungi    | Saccharomycetes | <i>Cyberlindnera</i>    | 1.68%  |
|    | Bacteria | Bacilli         | <i>Pediococcus</i>      | 78.63% |
|    | Bacteria | Bacilli         | <i>Weissella</i>        | 9.92%  |
| Q3 | Fungi    | Saccharomycetes | <i>Saccharomycopsis</i> | 74.99% |
|    | Fungi    | Saccharomycetes | <i>Wickerhamomyces</i>  | 19.53% |
|    | Fungi    | Saccharomycetes | <i>Cyberlindnera</i>    | 4.38%  |

Table S4. Microbial biomarkers during the different fermentation stages.

| Xiaoqu | Fermentation stage                    | Kingdom  | Order             | Genus                   |
|--------|---------------------------------------|----------|-------------------|-------------------------|
| Q1     | Initial starter tage (0 h)            | Bacteria | Lactobacillales   | <i>Weissella</i>        |
|        |                                       | Fungi    | Mucorales         | <i>Rhizopus</i>         |
|        | Saccharification stage (0-72 h)       | Bacteria | Xanthomonadales   | ..a                     |
|        |                                       | Fungi    | Saccharomycetales | <i>Saccharomycopsis</i> |
|        | Alcohol fermentation stage (72-336 h) | Bacteria | Lactobacillales   | <i>Pediococcus</i>      |
|        |                                       | Fungi    | Saccharomycetales | <i>Wickerhamomyces</i>  |
| Q2     | Initial starter tage (0 h)            | Bacteria | Bacillales        | <i>Bacillus</i>         |
|        |                                       | Fungi    | Mucorales         | <i>Rhizopus</i>         |
|        | Saccharification stage (0-72 h)       | Bacteria | Enterobacterales  | <i>Enterobacter</i>     |
|        |                                       | Fungi    | Saccharomycetales | unclassified            |
|        |                                       |          |                   | _f_Metschnikowiaceae    |
|        | Alcohol fermentation stage (72-336 h) | Bacteria | Lactobacillales   | <i>Pediococcus</i>      |
|        |                                       | Fungi    | Saccharomycetales | <i>Wickerhamomyces</i>  |
| Q3     | Initial starter tage (0 h)            | Bacteria | Lactobacillales   | <i>Weissella</i>        |
|        |                                       | Fungi    | Saccharomycetales | <i>Saccharomycopsis</i> |
|        | Saccharification stage (0-72 h)       | Bacteria | Burkholderiales   | <i>Achromobacter</i>    |
|        |                                       | Fungi    | -                 | -                       |
|        | Alcohol fermentation stage (72-336 h) | Bacteria | Lactobacillales   | <i>Pediococcus</i>      |
|        |                                       | Fungi    | Saccharomycetales | <i>Wickerhamomyces</i>  |

a “-”: not detected.

Table S5. The microbial genus by O2PLS modeling and the VIP &gt; 1 during different black rice wine fermentation.

| VIP > 1, $p < 0.05$ | Q1                               | Q2                                 | Q3                         |
|---------------------|----------------------------------|------------------------------------|----------------------------|
| Fungi               | <i>Wickerhamomyces</i>           | <i>Wickerhamomyces</i>             | <i>Saccharomycopsis</i>    |
|                     | <i>Saccharomycopsis</i>          | <i>Wallemia</i>                    | <i>Wickerhamomyces</i>     |
|                     | <i>Penicillium</i>               | <i>Trichosporon</i>                | <i>Schizosaccharomyces</i> |
|                     | <i>Saccharomyces</i>             | <i>Candida</i>                     | <i>Candida</i>             |
|                     |                                  | unclassified_f_                    |                            |
|                     | <i>Gibberella</i>                | Metschnikowiaceae                  | <i>Wallemia</i>            |
|                     |                                  | <i>Clavispora</i>                  | <i>Cyberlindnera</i>       |
|                     |                                  | <i>Apiotrichum</i>                 | <i>Clavispora</i>          |
|                     |                                  | <i>Rhizopus</i>                    | <i>Saccharomyces</i>       |
|                     |                                  | <i>Penicillium</i>                 | unclassified_p_            |
|                     |                                  |                                    | Ascomycota                 |
|                     |                                  | <i>Issatchenkia</i>                | unclassified_f_            |
|                     |                                  |                                    | Metschnikowiaceae          |
|                     |                                  | <i>Cladosporium</i>                |                            |
|                     |                                  | <i>Saccharomyces</i>               |                            |
| Bacteria            | <i>Rhodotorula</i>               |                                    |                            |
|                     | <i>Acinetobacter</i>             | <i>Weissella</i>                   | <i>Rosenbergiella</i>      |
|                     | unclassified_k_norank_d_         |                                    |                            |
|                     | Bacteria                         | <i>Pediococcus</i>                 | <i>Enterobacter</i>        |
|                     | <i>Achromobacter</i>             | <i>Achromobacter</i>               | <i>Gluconobacter</i>       |
|                     | <i>Pediococcus</i>               | <i>Staphylococcus</i>              | <i>Pantoea</i>             |
|                     | <i>Weissella</i>                 | <i>Streptomyces</i>                | <i>Achromobacter</i>       |
|                     | <i>Enterobacter</i>              | norank_f_JG30_KF_CM45              | <i>Lactococcus</i>         |
|                     | <i>Burkholderia_Caballeronia</i> | unclassified_k_norank_d_Bacteria   | <i>Pediococcus</i>         |
|                     | _Paraburkholderia                |                                    |                            |
|                     | <i>Pantoea</i>                   | <i>Clostridium_sensu_stricto_1</i> | <i>Bacillus</i>            |

*Lactobacillus*  
*Stenotrophomonas*

*Lactococcus*  
*Pseudomonas*  
*Lactobacillus*  
*Gordonia*  
*Leuconostoc*

*Pseudomonas*  
*Weissella*  
*Curtobacterium*  
*Enterococcus*  
*Sphingomonas*

**Table S6.** The function microbes thought Spearman's correlation coefficient and node degree during black rice wine fermentation.

| r > 0.6 and<br>Node Degree > 10 | Q1                     |                          | Q2                     |             | Q3                         |             |
|---------------------------------|------------------------|--------------------------|------------------------|-------------|----------------------------|-------------|
|                                 | Genus                  | Node Degree <sup>a</sup> | Genus                  | Node Degree | Genus                      | Node Degree |
| Fungi                           | <i>Wickerhamomyces</i> | 16                       | <i>Wickerhamomyces</i> | 17          | <i>Schizosaccharomyces</i> | 16          |
|                                 | <i>Saccharomyces</i>   | 16                       | <i>Wallemia</i>        | 16          | <i>Saccharomyces</i>       | 15          |
|                                 | <i>Trichosporon</i>    | 16                       | <i>Issatchenkia</i>    | 15          | <i>Wickerhamomyces</i>     | 15          |
|                                 | <i>Aspergillus</i>     | 14                       |                        |             | <i>Candida</i>             | 15          |
|                                 | <i>Issatchenkia</i>    | 11                       |                        |             | <i>Cyberlindnera</i>       | 15          |
| Bacteria                        |                        |                          |                        |             | <i>Wallemia</i>            | 15          |
|                                 |                        |                          |                        |             | <i>Clavispora</i>          | 13          |
|                                 | <i>Pediococcus</i>     | 16                       | <i>Pediococcus</i>     | 15          | <i>Pediococcus</i>         | 16          |
|                                 |                        |                          | <i>Weissella</i>       | 15          |                            |             |
|                                 |                        |                          | <i>Lactobacillus</i>   | 15          |                            |             |

<sup>a</sup>: Number of significant correlations between the microorganism and the characteristic aroma substances.
